# Supplementary material
Source: PubMed Central journal article supplement (PMC4974385)

## Supplementary Information

### A Supercomplex Spanning the Inner and Outer Membranes Mediates the Biogenesis of $\beta$ -barrel Outer Membrane Proteins in Bacteria

Yan Wang, Rui Wang, Feng Jin, Yang Liu, Jiayu Yu, Xinmiao Fu, and Zengyi Chang

#### Extended Experimental Procedures

##### Semi-native SDS-PAGE and immunoblotting

Semi-native and denaturing SDS-PAGE were respectively performed with the loading samples being not boiled or boiled for 10 minutes. The immunoblotting was performed according to standard protocols(1-2), but the gels from the semi-native SDS-PAGE were steamed for 10 minutes (for denaturing the lipid-surrounded  $\beta$ -barrel OMPs) before the proteins were transferred to the PVDF membrane.

##### Mass Spectrometry analysis of proteins

The gel around the 400 kD band on the Blue-Native gel was excised, dehydrated in acetonitrile, incubated in 50 mM ammonium bicarbonate containing 10 mM DTT at 56 °C for 40 min, then incubated in 50 mM ammonium biocarbonate containing 55 mM iodoacetamide at ambient temperature for 1 hr in the dark before dehydrated again. The proteins in the treated gel was subsequently digested with sequencing grade trypsin (1 ng/ $\mu$ L, in 50 mM ammonium bicarbonate) at 37 °C overnight, with the resulting peptides being extracted twice with 50% acetonitrile containing 5% formic acid before dried by vacuum centrifugation.

For liquid chromatography-tandem mass spectrometry (LC-MS/MS) analysis, the samples were desolved in 0.2% formic acid and then loaded onto a 100  $\mu$ m x 2 cm pre-column and separated on a 75  $\mu$ m x 15 cm capillary column with laser-pulled sprayer. Both columns were packed in-house with 4  $\mu$ m C18 bulk material (InnosepBio, P.R.China). An Easy nLC 1000 system (Thermo Scientific, USA) was used to deliver the following HPLC gradients: First, 5-30% of solution A (0.1% formic acid in acetonitrile) in 40 min, then 30-75% of solution A in 4 min before being held at 75% of A for 20 min (all being mixed with 0.1% formic acid in water). The eluted peptides were directly sprayed into a Velos Pro Orbitrap Elite mass spectrometer (Thermo Scientific, USA) equipped with a nano-electrospray ionization (ESI) source. The mass spectrometer was operated in the data-dependent mode with a full MS scan in FT mode at a resolution of 120,000 followed by CID (Collision Induced Dissociation) MS/MS scans on the 15 most abundant ions in the initial MS scan.

The raw data files were converted to mascot generic format (“.mgf”) using the MSConvert software before submitted for database search. Mascot (version 2.3.02) carried out all database search with the following parameters: Carbamidomethyl (Cys) as fixed modification and Oxidation (Met) as variable modification; +/- 5 ppm for peptide mass tolerance and +/- 0.6 Da for fragment mass tolerance; Max Missed Cleavages 2.

**Table S1. *E. coli* strains used in this study**

| Strain        | Description              | Sources                 |
|---------------|--------------------------|-------------------------|
| BW25113       | Wild type cells          | Keio collection, Japan. |
| $\Delta ompF$ | <i>ompF</i> gene deleted | Keio collection, Japan. |
| $\Delta lamB$ | <i>lamB</i> gene deleted | Keio collection, Japan. |

|              |                                                                                                                                    |                         |
|--------------|------------------------------------------------------------------------------------------------------------------------------------|-------------------------|
| <i>ΔsurA</i> | <i>surA</i> gene deleted                                                                                                           | Keio collection, Japan. |
| LY928        | Modified BW25113 strain whose chromosome was inserted with genes encoding the orthogonal Bpa-tRNA synthase and tRNA <sup>Bpa</sup> | Laboratory storage      |
| BamA-K135Bpa | Modified LY928 strain whose wild type <i>bamA</i> gene was replaced by a gene encoding BamA-K135Bpa                                | Laboratory storage      |

**Table S2. Plasmids used in this study**

| Plasmids                                                                                                                                                                                                                                                                                                                                                                                                                                                                                                                                                                                                                                                                                      | Description                                                                                                | Sources                 |
|-----------------------------------------------------------------------------------------------------------------------------------------------------------------------------------------------------------------------------------------------------------------------------------------------------------------------------------------------------------------------------------------------------------------------------------------------------------------------------------------------------------------------------------------------------------------------------------------------------------------------------------------------------------------------------------------------|------------------------------------------------------------------------------------------------------------|-------------------------|
| pSUP-Bpa-RS-6TRA                                                                                                                                                                                                                                                                                                                                                                                                                                                                                                                                                                                                                                                                              | Encoding both the tRNA <sup>Bpa</sup> and the Bpa-tRNA synthetase; carrying chloramphenicol resistant gene | (3)                     |
| pACE;<br>pDOC                                                                                                                                                                                                                                                                                                                                                                                                                                                                                                                                                                                                                                                                                 | For λ Red recombination-based gene-doctoring                                                               | Laboratory storage; (4) |
| pYLC                                                                                                                                                                                                                                                                                                                                                                                                                                                                                                                                                                                                                                                                                          | A modified low-copy-number pDOC containing a mutation in the replication origin                            | Laboratory storage      |
| pYLC-BamA-135K                                                                                                                                                                                                                                                                                                                                                                                                                                                                                                                                                                                                                                                                                | For replacing the wild type <i>bamA</i> gene with the gene encoding BamA-K135Bpa at the genome level       | This study              |
| pBAD-OmpF-A1Bpa-His <sub>6</sub> ,<br>pBAD-OmpF-V11Bpa-His <sub>6</sub> ,<br>pBAD-OmpF-Y32Bpa-His <sub>6</sub> ,<br>pBAD-OmpF-L43Bpa-His <sub>6</sub> ,<br>pBAD-OmpF-Q66Bpa-His <sub>6</sub> ,<br>pBAD-OmpF-S95Bpa-His <sub>6</sub> ,<br>pBAD-OmpF-E117Bpa-His <sub>6</sub> ,<br>pBAD-OmpF-Y157Bpa-His <sub>6</sub> ,<br>pBAD-OmpF-S169Bpa-His <sub>6</sub> ,<br>pBAD-OmpF-E183Bpa-His <sub>6</sub> ,<br>pBAD-OmpF-N198Bpa-His <sub>6</sub> ,<br>pBAD-OmpF-N252Bpa-His <sub>6</sub> ,<br>pBAD-OmpF-V289Bpa-His <sub>6</sub> ,<br>pBAD-OmpF-Y313Bpa-His <sub>6</sub> ,<br>pBAD-OmpF-D319Bpa-His <sub>6</sub> ,<br>pBAD-OmpF-G325Bpa-His <sub>6</sub> ,<br>pBAD-OmpF-T331Bpa-His <sub>6</sub> , | Encoding the Bpa-incorporated variants of His-tagged OmpF; carrying ampicillin resistant gene              | This study              |
| pBAD-LamB-His <sub>6</sub>                                                                                                                                                                                                                                                                                                                                                                                                                                                                                                                                                                                                                                                                    | Encoding the His-tagged LamB; carrying ampicillin resistant gene                                           | This study              |
| pBAD-LamB-G5Bpa-His <sub>6</sub> ,<br>pBAD-LamB-G12Bpa-His <sub>6</sub> ,<br>pBAD-LamB-Q20Bpa-His <sub>6</sub> ,<br>pBAD-LamB-G27Bpa-His <sub>6</sub> ,<br>pBAD-LamB-L34Bpa-His <sub>6</sub> ,<br>pBAD-LamB-N116Bpa-His <sub>6</sub> ,<br>pBAD-LamB-S146Bpa-His <sub>6</sub> ,<br>pBAD-LamB-L176Bpa-His <sub>6</sub> ,<br>pBAD-LamB-N206Bpa-His <sub>6</sub> ,<br>pBAD-LamB-T236Bpa-His <sub>6</sub> ,<br>pBAD-LamB-N266Bpa-His <sub>6</sub> ,                                                                                                                                                                                                                                                | Encoding the Bpa-incorporated variants of His-tagged LamB; carrying ampicillin resistant gene              | This study              |

|                                                                                                                                                                                                                                                                                                                                                                                                                                                                                                                                                                                                                                                                                                                                                                                                                                                                                                                                                                                                                                                                                                                                                                                                                                                                                                                                                                                                                                                                                                                                                                                                                                                                                                                                                                                                             |                                                                                               |            |
|-------------------------------------------------------------------------------------------------------------------------------------------------------------------------------------------------------------------------------------------------------------------------------------------------------------------------------------------------------------------------------------------------------------------------------------------------------------------------------------------------------------------------------------------------------------------------------------------------------------------------------------------------------------------------------------------------------------------------------------------------------------------------------------------------------------------------------------------------------------------------------------------------------------------------------------------------------------------------------------------------------------------------------------------------------------------------------------------------------------------------------------------------------------------------------------------------------------------------------------------------------------------------------------------------------------------------------------------------------------------------------------------------------------------------------------------------------------------------------------------------------------------------------------------------------------------------------------------------------------------------------------------------------------------------------------------------------------------------------------------------------------------------------------------------------------|-----------------------------------------------------------------------------------------------|------------|
| pBAD-LamB-N296Bpa-His <sub>6</sub> ,<br>pBAD-LamB-I326Bpa-His <sub>6</sub> ,<br>pBAD-LamB-S356Bpa-His <sub>6</sub> ,<br>pBAD-LamB-Y378Bpa-His <sub>6</sub> ,<br>pBAD-LamB-N386Bpa-His <sub>6</sub> ,<br>pBAD-LamB-A393Bpa-His <sub>6</sub> ,<br>pBAD-LamB-G400Bpa-His <sub>6</sub> ,<br>pBAD-LamB-S408Bpa-His <sub>6</sub> ,                                                                                                                                                                                                                                                                                                                                                                                                                                                                                                                                                                                                                                                                                                                                                                                                                                                                                                                                                                                                                                                                                                                                                                                                                                                                                                                                                                                                                                                                                |                                                                                               |            |
| pBAD-SurA-His <sub>6</sub>                                                                                                                                                                                                                                                                                                                                                                                                                                                                                                                                                                                                                                                                                                                                                                                                                                                                                                                                                                                                                                                                                                                                                                                                                                                                                                                                                                                                                                                                                                                                                                                                                                                                                                                                                                                  | Encoding the His-tagged SurA; carrying ampicillin resistant gene                              | This study |
| pBAD-SurA-A1Bpa-His <sub>6</sub> ,<br>pBAD-SurA-D6Bpa-His <sub>6</sub> ,<br>pBAD-SurA-V17Bpa-His <sub>6</sub> ,<br>pBAD-SurA-V22Bpa-His <sub>6</sub> ,<br>pBAD-SurA-S28Bpa-His <sub>6</sub> ,<br>pBAD-SurA-Q35Bpa-His <sub>6</sub> ,<br>pBAD-SurA-L40Bpa-His <sub>6</sub> ,<br>pBAD-SurA-R47Bpa-His <sub>6</sub> ,<br>pBAD-SurA-E52Bpa-His <sub>6</sub> ,<br>pBAD-SurA-G64Bpa-His <sub>6</sub> ,<br>pBAD-SurA-I71Bpa-His <sub>6</sub> ,<br>pBAD-SurA-D77Bpa-His <sub>6</sub> ,<br>pBAD-SurA-N82Bpa-His <sub>6</sub> ,<br>pBAD-SurA-N88Bpa-His <sub>6</sub> ,<br>pBAD-SurA-M94Bpa-His <sub>6</sub> ,<br>pBAD-SurA-Y100Bpa-His <sub>6</sub> ,<br>pBAD-SurA-Y108Bpa-His <sub>6</sub> ,<br>pBAD-SurA-E120Bpa-His <sub>6</sub> ,<br>pBAD-SurA-E125Bpa-His <sub>6</sub> ,<br>pBAD-SurA-I130Bpa-His <sub>6</sub> ,<br>pBAD-SurA-Q135Bpa-His <sub>6</sub> ,<br>pBAD-SurA-Q142Bpa-His <sub>6</sub> ,<br>pBAD-SurA-D149Bpa-His <sub>6</sub> ,<br>pBAD-SurA-L156Bpa-His <sub>6</sub> ,<br>pBAD-SurA-P162Bpa-His <sub>6</sub> ,<br>pBAD-SurA-D170Bpa-His <sub>6</sub> ,<br>pBAD-SurA-Q178Bpa-His <sub>6</sub> ,<br>pBAD-SurA-Q185Bpa-His <sub>6</sub> ,<br>pBAD-SurA-F192Bpa-His <sub>6</sub> ,<br>pBAD-SurA-H199Bpa-His <sub>6</sub> ,<br>pBAD-SurA-N207Bpa-His <sub>6</sub> ,<br>pBAD-SurA-R215Bpa-His <sub>6</sub> ,<br>pBAD-SurA-I222Bpa-His <sub>6</sub> ,<br>pBAD-SurA-T229Bpa-His <sub>6</sub> ,<br>pBAD-SurA-V236Bpa-His <sub>6</sub> ,<br>pBAD-SurA-G244Bpa-His <sub>6</sub> ,<br>pBAD-SurA-D252Bpa-His <sub>6</sub> ,<br>pBAD-SurA-I260Bpa-His <sub>6</sub> ,<br>pBAD-SurA-R268Bpa-His <sub>6</sub> ,<br>pBAD-SurA-P276Bpa-His <sub>6</sub> ,<br>pBAD-SurA-R284Bpa-His <sub>6</sub> ,<br>pBAD-SurA-S291Bpa-His <sub>6</sub> ,<br>pBAD-SurA-G297Bpa-His <sub>6</sub> ,<br>pBAD-SurA-A305Bpa-His <sub>6</sub> , | Encoding the Bpa-incorporated variants of His-tagged SurA; carrying ampicillin resistant gene | This study |

|                                                                                                                                                                                                                                                                                                                                                                                                                                                                                                                                                                              |  |  |
|------------------------------------------------------------------------------------------------------------------------------------------------------------------------------------------------------------------------------------------------------------------------------------------------------------------------------------------------------------------------------------------------------------------------------------------------------------------------------------------------------------------------------------------------------------------------------|--|--|
| pBAD-SurA-N311Bpa-His <sub>6</sub> ,<br>pBAD-SurA-N316Bpa-His <sub>6</sub> ,<br>pBAD-SurA-L321Bpa-His <sub>6</sub> ,<br>pBAD-SurA-N327Bpa-His <sub>6</sub> ,<br>pBAD-SurA-F333Bpa-His <sub>6</sub> ,<br>pBAD-SurA-N341Bpa-His <sub>6</sub> ,<br>pBAD-SurA-V349Bpa-His <sub>6</sub> ,<br>pBAD-SurA-A357Bpa-His <sub>6</sub> ,<br>pBAD-SurA-N365Bpa-His <sub>6</sub> ,<br>pBAD-SurA-Y378Bpa-His <sub>6</sub> ,<br>pBAD-SurA-F386Bpa-His <sub>6</sub> ,<br>pBAD-SurA-S392Bpa-His <sub>6</sub> ,<br>pBAD-SurA-Q397Bpa-His <sub>6</sub> ,<br>pBAD-SurA-V403Bpa-His <sub>6</sub> , |  |  |
|------------------------------------------------------------------------------------------------------------------------------------------------------------------------------------------------------------------------------------------------------------------------------------------------------------------------------------------------------------------------------------------------------------------------------------------------------------------------------------------------------------------------------------------------------------------------------|--|--|

**Table S3. Antibodies used in this study**

| <b>Antibodies</b>             | <b>Animal immunized</b> | <b>Type</b> | <b>Working dilution</b> | <b>Sources</b>               |
|-------------------------------|-------------------------|-------------|-------------------------|------------------------------|
| Anti-His tag                  | Mouse                   | Monoclonal  | 1/2,000                 | TransGen Biotech             |
| Anti-SurA                     | Rabbit                  | Polyclonal  | 1/10,000                | Our lab                      |
| Anti-BamA                     | Rabbit                  | Polyclonal  | 1/10,000                | Our lab                      |
| Anti-OmpF                     | Mouse                   | Polyclonal  | 1/10,000                | Our lab                      |
| Anti-LamB                     | Goat                    | Polyclonal  | 1/10,000                | Silhavy lab                  |
| Anti-SecY                     | Rabbit                  | Polyclonal  | 1/10,000                | Tokuda lab and Nishiyama lab |
| Anti-SecE                     | Rabbit                  | Polyclonal  | 1/10,000                | Tokuda lab and Nishiyama lab |
| Anti-BamB                     | Rabbit                  | Polyclonal  | 1/10,000                | Our lab                      |
| Anti-SecA                     | Rabbit                  | Polyclonal  | 1/10,000                | Our lab                      |
| Anti-PpiD                     | Rabbit                  | Polyclonal  | 1/10,000                | Our lab                      |
| Anti-ATPase-alpha subunit     | Rabbit                  | Polyclonal  | 1/5,000                 | Our lab                      |
| Anti-MalE                     | Rabbit                  | Polyclonal  | 1/5,000                 | Our lab                      |
| Anti-DegP                     | Rabbit                  | Polyclonal  | 1/5,000                 | Our lab                      |
| Anti-GroEL                    | Mouse                   | Polyclonal  | 1/5,000                 | Our lab                      |
| AP-conjugated anti-mouse IgG  | Rabbit                  | Polyclonal  | 1/5,000                 | TransGen Biotech             |
| AP-conjugated anti-rabbit IgG | Goat                    | Polyclonal  | 1/5,000                 | TransGen Biotech             |
| AP-conjugated anti-goat IgG   | Rabbit                  | Polyclonal  | 1/5,000                 | TransGen Biotech             |

**Table S4. Proteins identified by Mass spectrometry analysis from the 400 kD band resolved from the inner membrane fraction of the wild type cells.**

| NAME        | DESCRIPTION                                     | SCORE |
|-------------|-------------------------------------------------|-------|
| MCP1        | Methyl-accepting chemotaxis protein I           | 345   |
| ASPG2       | L-asparaginase 2                                | 291   |
| YAET (BamA) | Outer membrane protein assembly factor yaeT     | 285   |
| MCP2        | Methyl-accepting chemotaxis protein II          | 240   |
| OMPF        | Outer membrane protein F                        | 176   |
| LPP         | Major outer membrane lipoprotein                | 133   |
| OMPC        | Outer membrane protein C                        | 122   |
| SECA        | Protein translocase subunit secA                | 86    |
| MCP3        | Methyl-accepting chemotaxis protein III         | 71    |
| PTTBC       | PTS system trehalose-specific EIIBC component   | 66    |
| RLPA        | Rare lipoprotein A                              | 63    |
| TOLC        | Outer membrane protein tolC                     | 60    |
| METQ        | D-methionine-binding lipoprotein metQ           | 56    |
| TSX         | Nucleoside-specific channel-forming protein tsx | 53    |
| PPID        | Peptidyl-prolyl cis-trans isomerase D           | 53    |

**Table S5. Proteins identified by mass spectrometry analysis from the 400 kD band region resolved from the inner membrane fraction of the BamA-depleted cells.**

| NAME | DESCRIPTION                                              | SCORE |
|------|----------------------------------------------------------|-------|
| OPGG | Glucans biosynthesis protein G                           | 762   |
| FDOG | Formate dehydrogenase-O major subunit                    | 526   |
| OMPA | Outer membrane protein A                                 | 401   |
| UBID | 3-octaprenyl-4-hydroxybenzoate carboxy-lyase             | 306   |
| ATPG | ATP synthase gamma chain                                 | 285   |
| MSBA | Lipid A export ATP-binding/permease protein msbA         | 225   |
| MIND | Septum site-determining protein minD                     | 128   |
| CORA | Magnesium transport protein corA                         | 104   |
| YADG | Uncharacterized ABC transporter ATP-binding protein yadG | 86    |
| CYOA | Ubiquinol oxidase subunit 2                              | 73    |
| PTND | Mannose permease IID component                           | 54    |

## References

1. Ge, X., et al. (2014) DegP primarily functions as a protease for the biogenesis of beta-barrel outer membrane proteins in the Gram-negative bacterium *Escherichia coli*. *FEBS J* **281**, 1226-40.
2. Wimley, W.C. (2002) Toward genomic identification of beta-barrel membrane proteins: composition and architecture of known structures. *Protein Sci* **11**, 301-12.
3. Chin, J.W., Martin, A.B., King, D.S., Wang, L., and Schultz, P.G. (2002) Addition of a photocrosslinking amino acid to the genetic code of *Escherichia coli*. *Proc Natl Acad Sci USA* **99**, 11020-4.
4. Lee, D.J., et al. (2009) Gene doctoring: a method for recombineering in laboratory and

## Supplemental Figure Legends

**Figure S1 Immunoblotting results of the *in vivo* photo-crosslinking products of the 58 Bpa variants of SurA, resolved by SDS-PAGE and probed with antibody against OmpF.** Indicated on the right are the positions of the mature OmpF (mOmpF), OmpF precursor (pre-OmpF) and the SurA-OmpF crosslinked product. Indicated on the left are the positions of the molecular weight markers.

**Figure S2. Immunoblotting results of the *in vivo* photo-crosslinking products of the 58 Bpa variants of SurA, resolved by SDS-PAGE and probed with antibody against LamB,**

**Figure S3. Immunoblotting results of the *in vivo* photo-crosslinking products of the 58 Bpa variants of SurA, resolved by SDS-PAGE and probed with antibody against Bama.**

**Figure S4. Immunoblotting results of the *in vivo* photo-crosslinking products of the 58 Bpa variants of SurA, resolved by SDS-PAGE and probed with antibody against the His-tag linked to SurA.**

**Figure S5. Functional complementation of the 58 Bpa variants of SurA in  $\Delta surA$  cells cultured under the envelope-disrupting stress condition**

The  $\Delta surA$  cells expressing each of the 58 Bpa variants of SurA were cultured at 37°C in LB medium to an OD<sub>600</sub> of about 1.0 before diluted and plated on LB dishes (with 0.005% arabinose added for inducing the expression of SurA variant proteins) under normal condition (left panel) or the envelope-disrupting stress condition (with 0.5% (w/v) SDS and 1 mM EDTA; right panel). The  $\Delta surA$  cells, that are unable to grow under the stress condition, and the SurA-containing wild type cells, that are able to grow under the stress condition, were respectively analyzed as negative and positive controls (displayed on the top part).

**Figure S6. Analyzing the folding capacity of the Bpa variants of OmpF with the Bpa residue placed in the N- and C-terminal region, and the nascent nature of the OmpF bound to SurA.**

**(A, B)** Immunoblotting results of the *in vivo* photo-crosslinking products of the 17 Bpa variants of OmpF or the 19 Bpa variants of LamB, resolved by SDS-PAGE and probed with antibody against the His-tag linked to OmpF or LamB,

**(C)** Immunoblotting results to detect the folding/assembling status of the Bpa variants of His-tagged OmpF, resolved by semi-native SDS-PAGE and probed with antibody against the His-tag. The His-tagged OmpF with no Bpa incorporation was analyzed as the negative control.

**(D)** Immunoblotting analysis results of the photo-crosslinking products of the OmpF-Y32Bpa variant probed with the antibody against SurA, the cells were treated with chloramphenicol (a protein synthesis inhibitor) for the indicated length of time before UV irradiation.

**Figure S7 Immunoblotting analysis of the photo-crosslinked SurA-PpiD in the inner and outer membrane fractions that were separated by sucrose density gradient centrifugation. The  $\alpha$ -subunit of ATP synthase and the OmpF were respectively analyzed as markers of the inner and outer membranes..**

**Figure S8. Immunoblotting results of the *in vivo* photo-crosslinking products of the 58 Bpa variants of SurA resolved by SDS-PAGE and probed with antibody against PpiD.**

**Figure S9. Immunoblotting analysis of the inner and outer membrane fractions of the wild-type cells treated with chloramphenicol.**

Membrane fractions were separated by sucrose density gradient centrifugation, resolved by SDS-PAGE and probed with antibodies against SurA, BamA, SecY, SecE, PpiD, SecA or BamB. The relative amounts of the probed protein in each fraction were quantified (mean  $\pm$  SEM; n = 3) from the immunoblotting results and displayed in the right panel. The  $\alpha$ -subunit of ATP synthase and the OmpF were respectively analyzed as markers of the inner and outer membranes.

## Figures

### Supplemental Figure 1

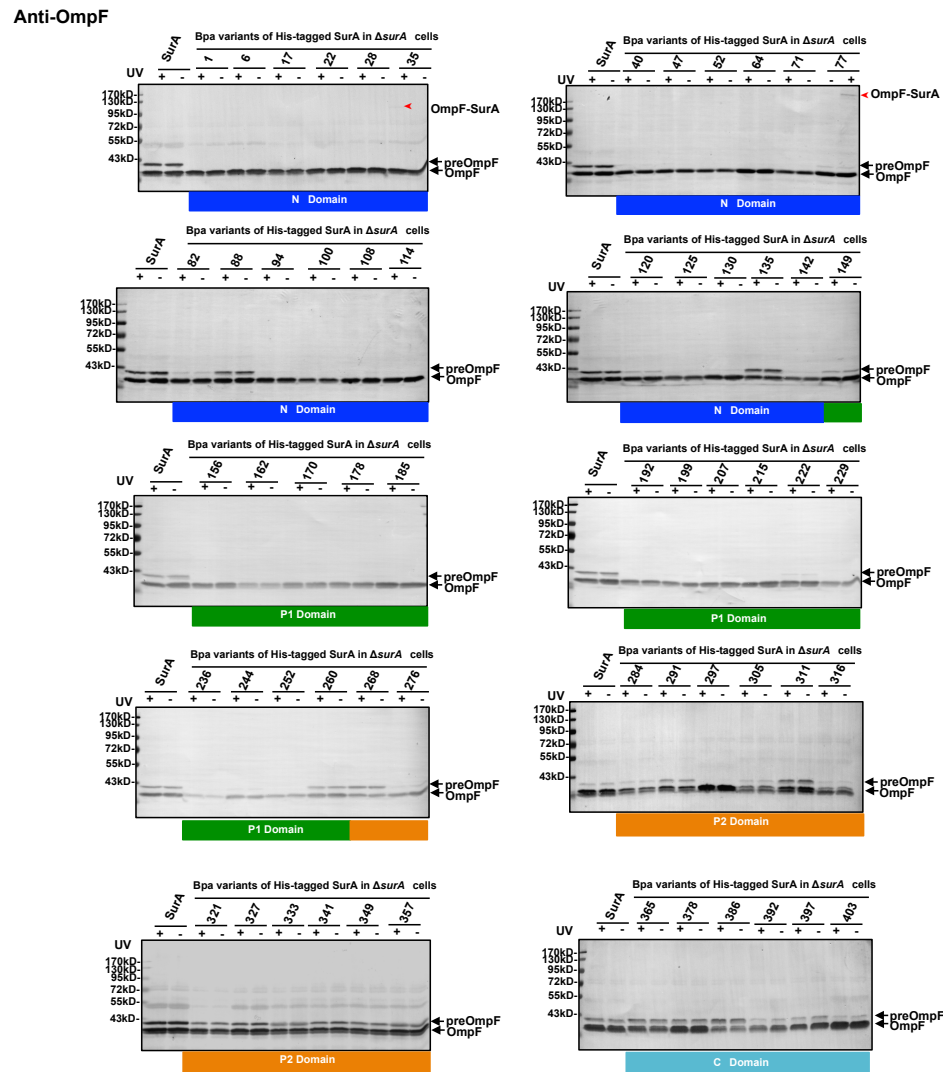

# Supplemental Figure 2

## Anti-LamB

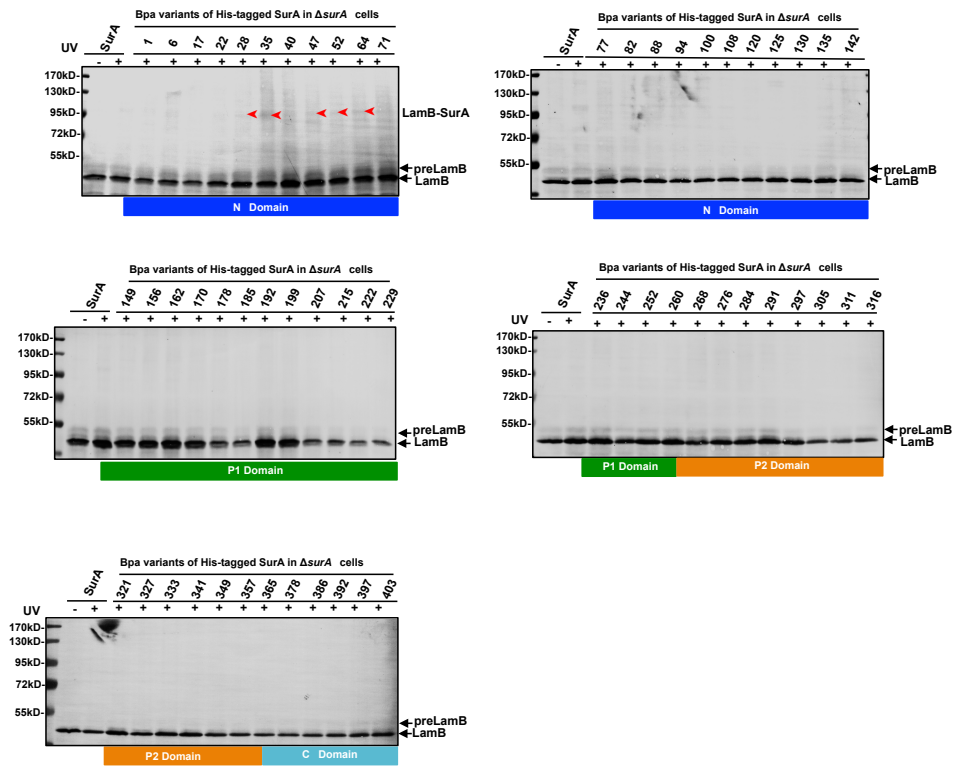

# **Supplemental Figure 3** **Anti-BamA**

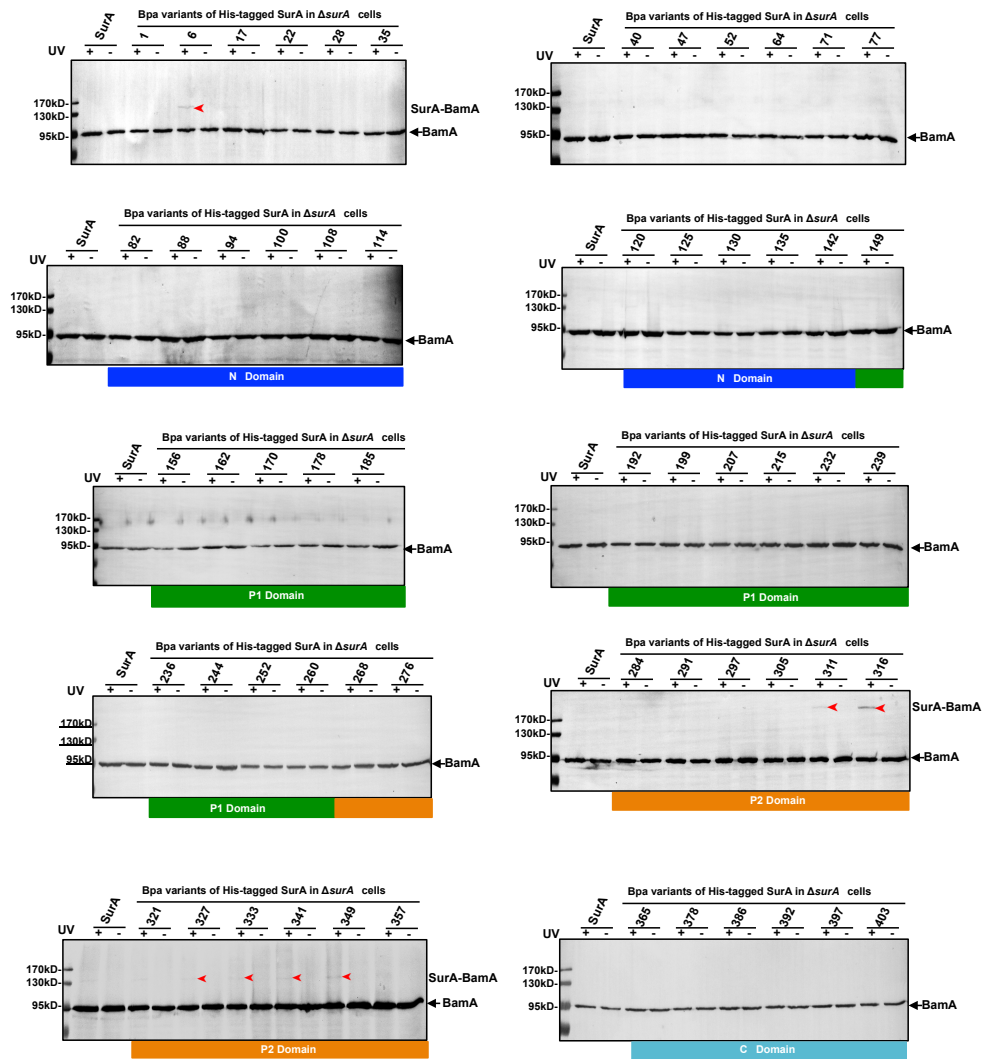

Supplemental Figure 4

Anti-His

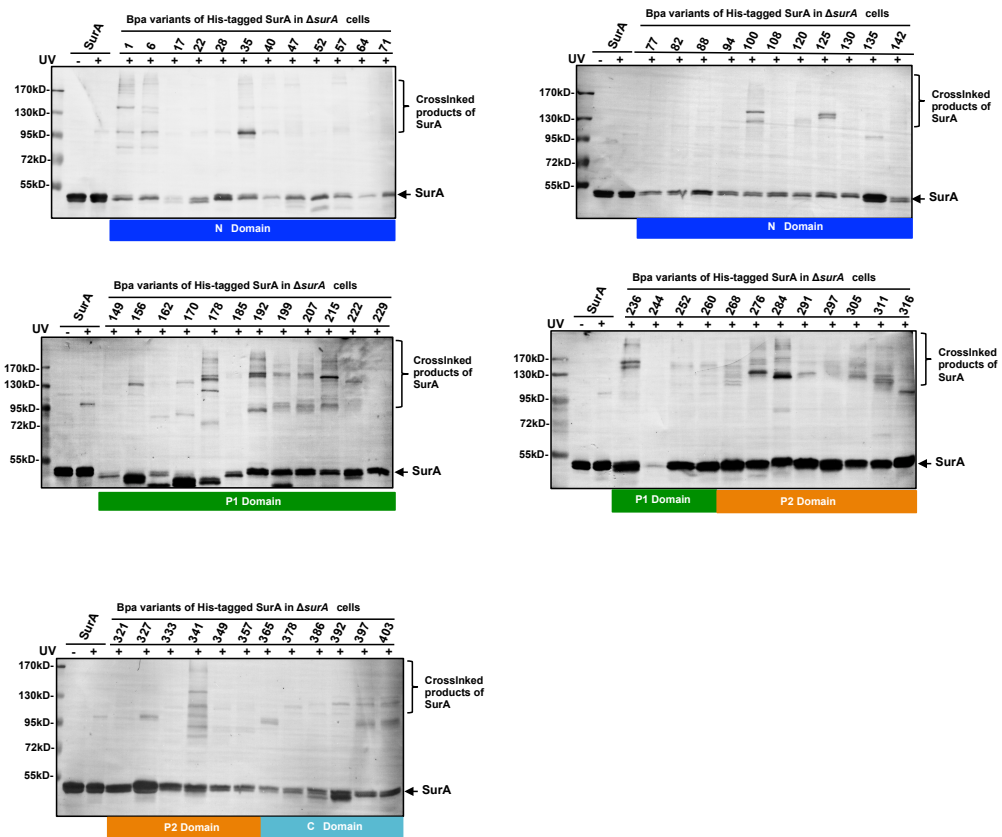

Supplemental Figure 5

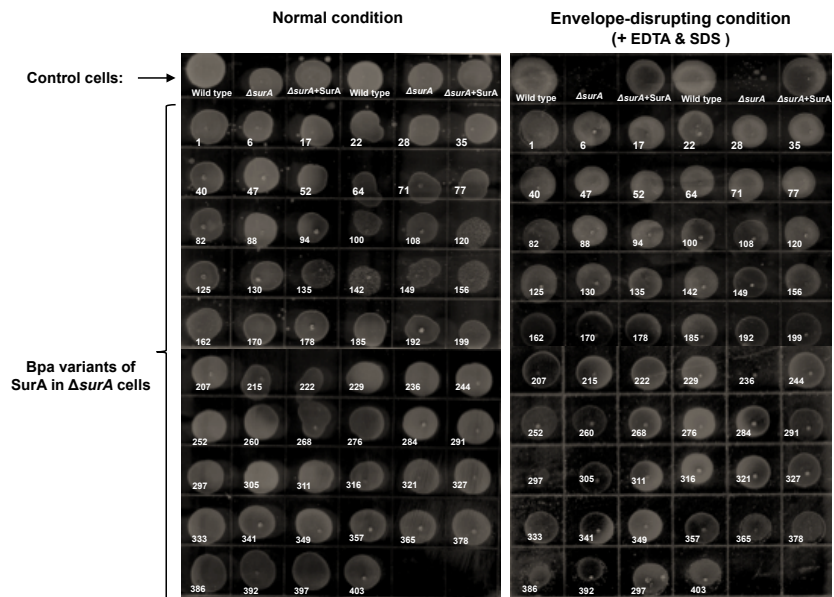

Supplemental Figure 6

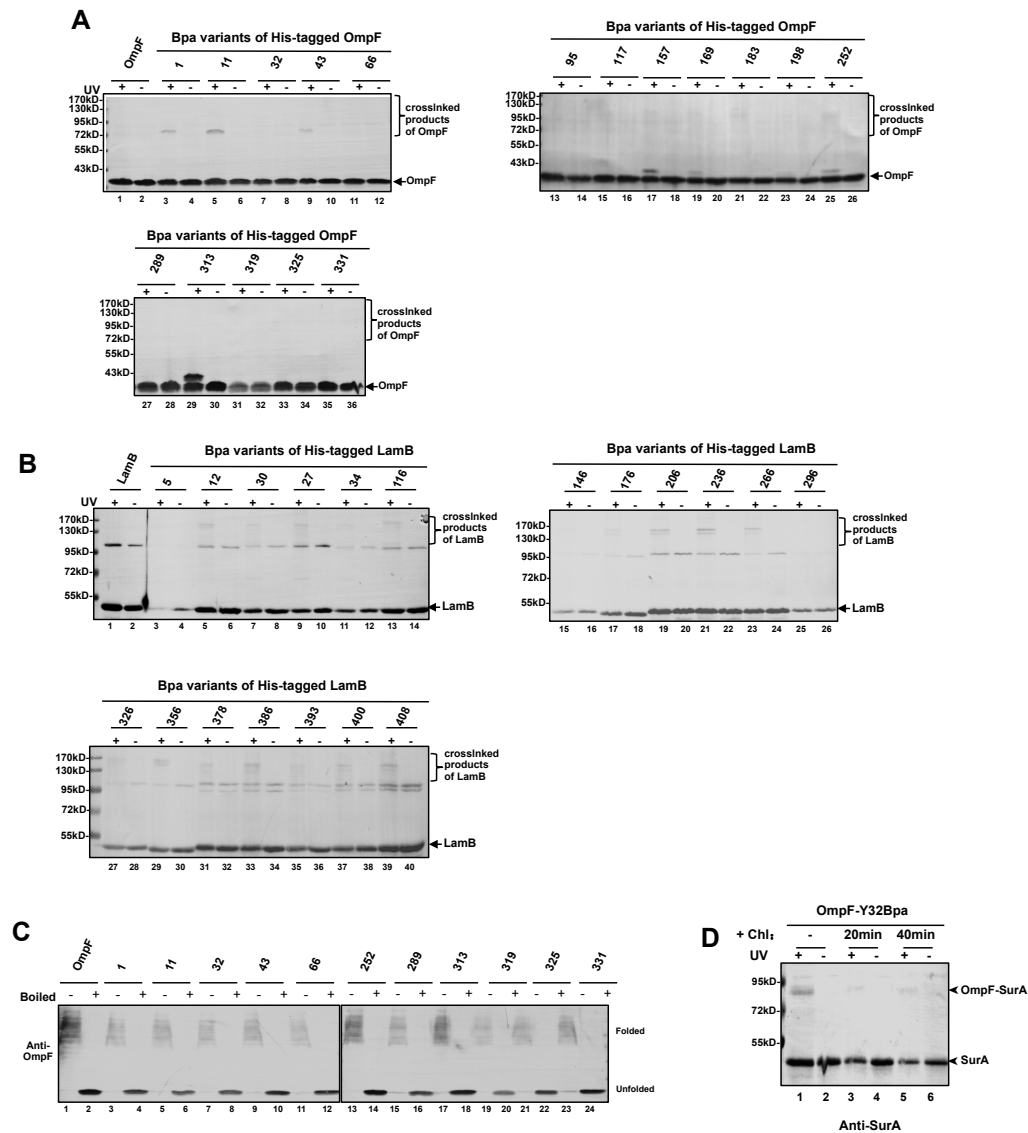

Supplemental Figure 7

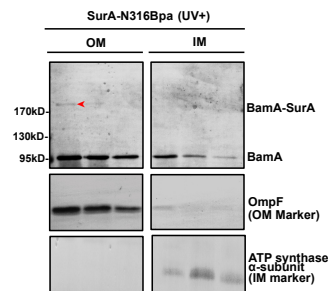

Supplemental Figure 8

Anti-PpiD

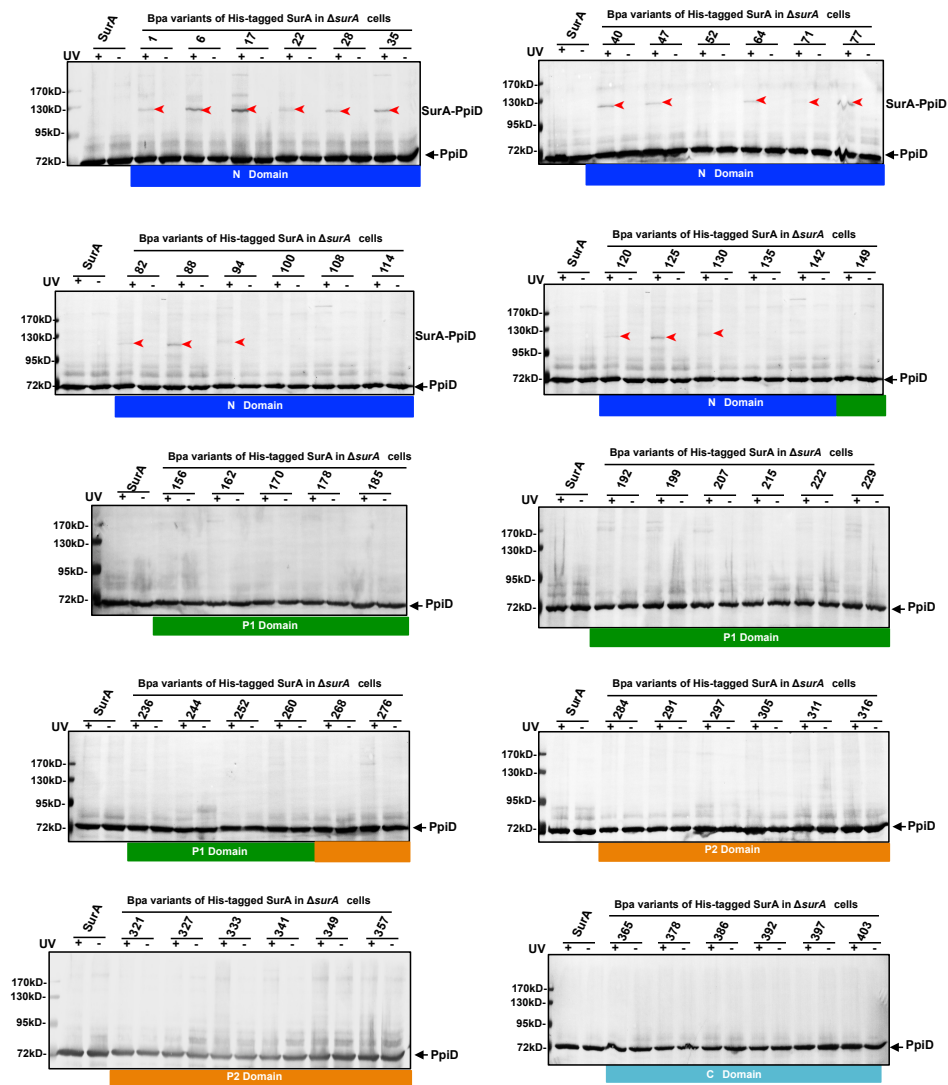

Supplemental Figure 9

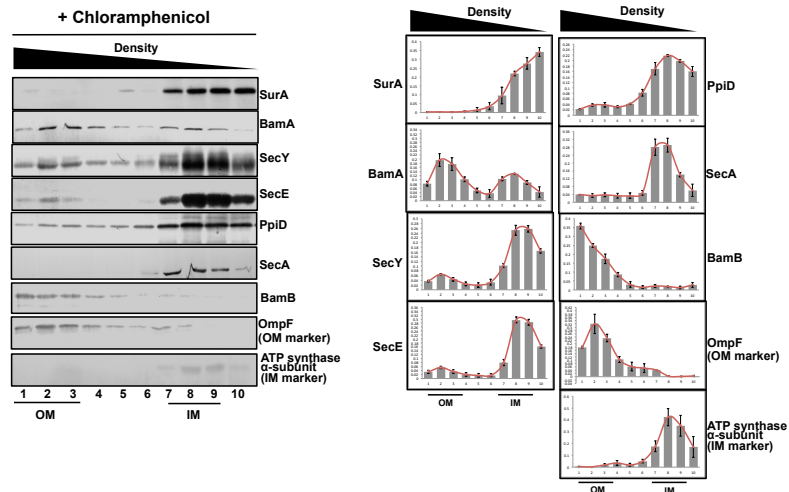

Supplement: 10.1074_M115.710715_jbc.M115.710715-1.pdf [file 10.1074_M115.710715_jbc.M115.710715-1.pdf]
